# Supplementary material for: Genetic neurological channelopathies: molecular genetics and clinical phenotypes
Source: HighWire-hosted journal article supplement (doi:10.1136/jnnp-2015-311233), 2015-11-11

Supplemental Fig 1: Schematic diagram illustrating different neurological symptoms associated with inherited mutations of ion channels

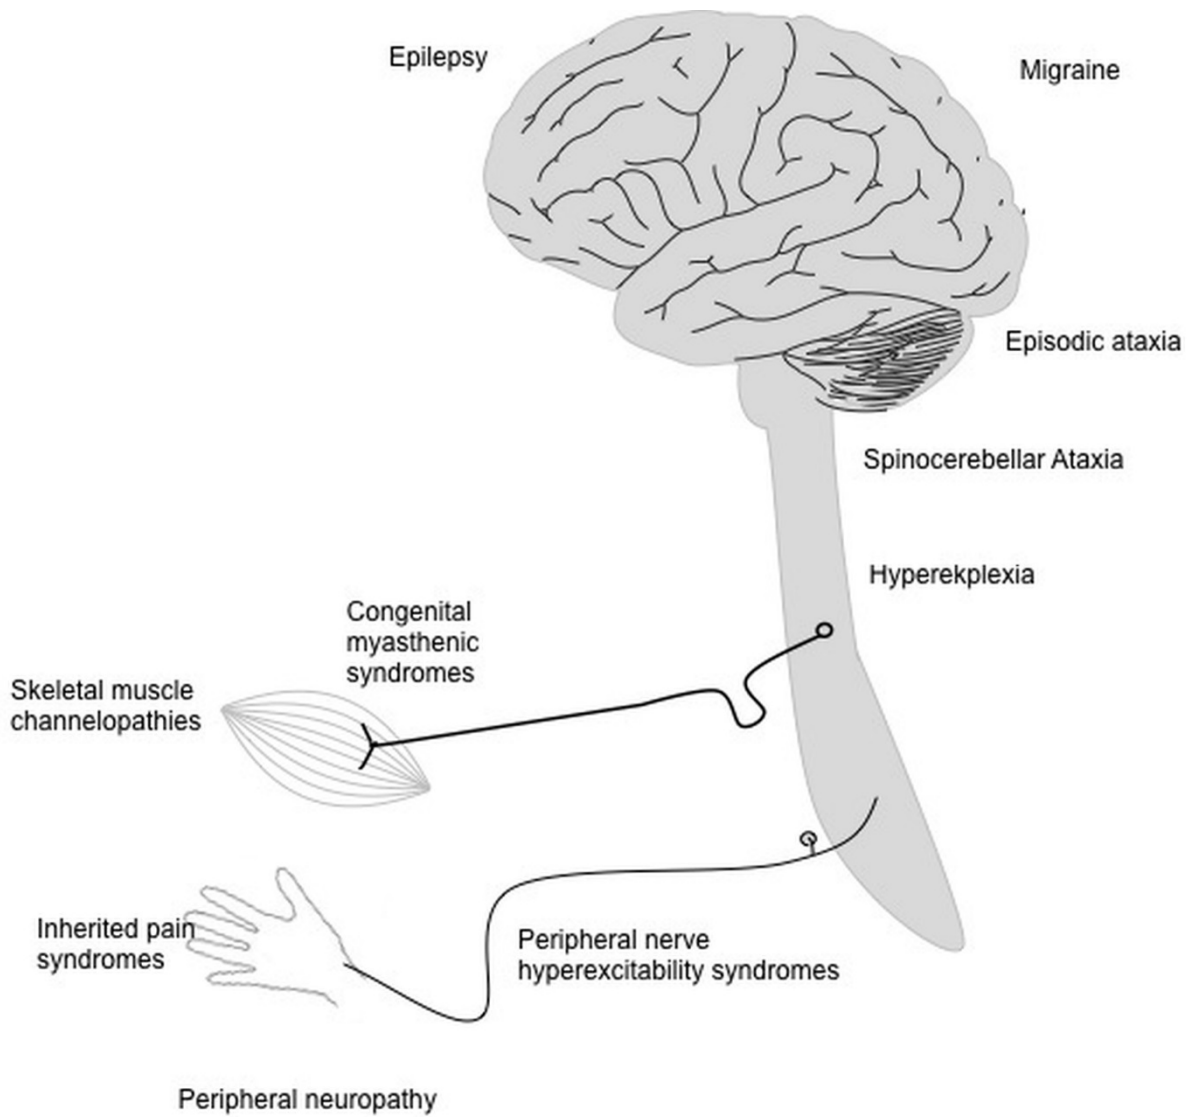

Supplement: jnnp-2015-311233supp_figure.pdf [file jnnp-2015-311233supp_figure.pdf]
